# Supplementary material for: Stabilization of hypoxia-inducible factor 1α and regulation of specific gut microbes by EGCG contribute to the alleviation of ileal barrier disorder and obesity
Source: Royal Society of Chemistry journal article supplement (doi:10.1039/d4fo02283a), 2024-01-01
Supplement: d4fo02283a1.pdf [file d4fo02283a1.pdf]

## Electronic Supplementary Information:

### Stabilization of hypoxia-inducible factor 1 $\alpha$ and regulation of specific gut microbes

#### by EGCG contribute to the alleviation of ileal barrier disorder and obesity

Hui Ma,<sup>\*a</sup> Yuanyifei Wang,<sup>b</sup> JiaYu Wei,<sup>a</sup> Xiaochi Wang,<sup>a</sup> Hui Yang,<sup>a</sup> and Shuo Wang<sup>\*b</sup>

<sup>a</sup> College of Food Science, Shanxi Normal University, Taiyuan 030031, Shanxi, China

<sup>b</sup> Tianjin Key Laboratory of Food Science and Health, School of Medicine, Nankai University, Tianjin 300071, China

---

\* Corresponding author. Email: [huima@sxnu.edu.cn](mailto:huima@sxnu.edu.cn) (H, Ma),

[wangshuo@nankai.edu.cn](mailto:wangshuo@nankai.edu.cn) (S. Wang)

**Table S1** The formulas of the low-fat control diet and high-fat diet

| Product #              | D12450J        |             | D12492        |             |
|------------------------|----------------|-------------|---------------|-------------|
|                        | gm%            | kcal%       | gm%           | kcal%       |
| Protein                | 19.2           | 20          | 26            | 20          |
| Carbohydrate           | 67.3           | 70          | 26            | 20          |
| Fat                    | 4.3            | 10          | 35            | 60          |
| Total                  |                | 100         |               | 100         |
| kcal/gm                | 3.85           |             | 5.24          |             |
| <b>Ingredient</b>      | <b>gm</b>      | <b>kcal</b> | <b>gm</b>     | <b>kcal</b> |
| Casein,80 Mesh         | 200            | 800         | 200           | 800         |
| L-Cystine              | 3              | 12          | 3             | 12          |
| Corn Starch            | 506.2          | 2024.8      | 0             | 0           |
| Maltodextrin 10        | 125            | 500         | 125           | 500         |
| Sucrose                | 68.8           | 275.2       | 68.8          | 275.2       |
| Cellulose, BW200       | 50             | 0           | 50            | 0           |
| Soybean Oil            | 25             | 225         | 25            | 225         |
| Lard                   | 20             | 180         | 245           | 2205        |
| Mineral Mix S10026     | 10             | 0           | 10            | 0           |
| DiCalcium Phosphate    | 13             | 0           | 13            | 0           |
| Calcium Carbonate      | 5.5            | 0           | 5.5           | 0           |
| Potassium Citrate,1H2O | 16.5           | 0           | 16.5          | 0           |
| Vitamin Mix V10001     | 10             | 40          | 10            | 40          |
| Choline Bitartrate     | 2              | 0           | 2             | 0           |
| FD&C Yellow Dye #5     | 0.04           | 0           | 0             | 0           |
| FD&C Blue Dye #1       | 0.01           | 0           | 0.05          | 0           |
| <b>Total</b>           | <b>1055.05</b> | <b>4057</b> | <b>773.85</b> | <b>4057</b> |

**Table S2** Primer sequences designed for mice

| Gene               | Forward primer (5'→3')    | Reverse primer (5'→3')    |
|--------------------|---------------------------|---------------------------|
| HSL                | GCTAGCCAGGCTCATCTCCT      | GTTCTTGAGGTAGGGCTCGT      |
| ACOX               | CTATGGGATCAGCCAGAAAGG     | AGTCAAAGGCATCCACCAAAG     |
| Leptin             | CCTGTGGCTTTGGTCCATCTG     | AGGCAAGCTGGTGAGGATCTG     |
| ACC                | GGCAGCAGTTACACCACATAC     | TCATTACCTCAATCTCAGCATAGC  |
| PGC1 $\alpha$      | AGCCGTGACCACTGACAACGAG    | GCTGCATGGTTCTGAGTGCTAAG   |
| TNF $\alpha$       | AATGGCCTCCCTCTCATCAG      | CCACTTGGTGGTTTGCTACG      |
| IL-6               | ACTTCCATCCAGTTGCCTTCTTG   | TGTTGGGAGTGGTATCCTCTGTG   |
| IL-1 $\beta$       | AAGGGCTG TTCCAAACCTTTGAC  | TGCCTGAAGCT TTGTTGATGTGC  |
| Reg3 $\gamma$      | CCATCTTCACGTAGCAGC        | CAAGATGTCCTGAGGGC         |
| Angio4             | TGGCCAGCTTTGGAATCACTG     | GCTTGGCATCATAGTGCTGACG    |
| $\alpha$ -defensin | GGTGATCATCAGACCCAGCATCAGT | AAGAGACTAAAAGTGGAGGAGCAGC |
| ZO-1               | GGGGCCTACACTGATCAAGA      | TGGAGATGAGGCTTCTGCTT      |
| Occludin           | ACGGACCCTGACCACTATGA      | TCAGCAGCAGCCATGTACTC      |
| JAM-A              | GCCAGATCACAGCTCCCTAT      | ACTGATCGTCGGCTTGGATG      |
| Mucin2             | ACCTGGAAGGCCCAATCAAG      | CTCAGCGTAGTTGGCACTCT      |
| HIF1 $\alpha$      | TTAAAGCCAACTCTTTGCTCCG    | ATGGGGGCATTACCAGACAG      |
| $\beta$ -actin     | ACAGCAGTTGGTTGGAGCAA      | ACGCGACCATCCTCCTCTTA      |

## Primer sequences designed for Caco-2

| Gene     | Forward primer (5'→3')      | Reverse primer (5'→3')      |
|----------|-----------------------------|-----------------------------|
| ZO-1     | GGGTAACGCCATCCTCTGAA        | CTGGTCCTCCTTTCAGCACA        |
| Occludin | TCAGGGAATATCCACCTATCACTTCAG | CATCAGCAGCAGCCATGTACTCTTCAC |
| Claudin  | GCGCGATATTTCTTCTTGCAGG      | TTCGTACCTGGCATTGACTGG       |
| JAM-A    | ATAGCCGAGGCCACTTTGAC        | TTCTCCTTCACTTCGGGCAC        |
| GAPDH    | CAACGGATTTGGTCGTATTGGG      | AAGGGGTCATTGATGGCAAC        |

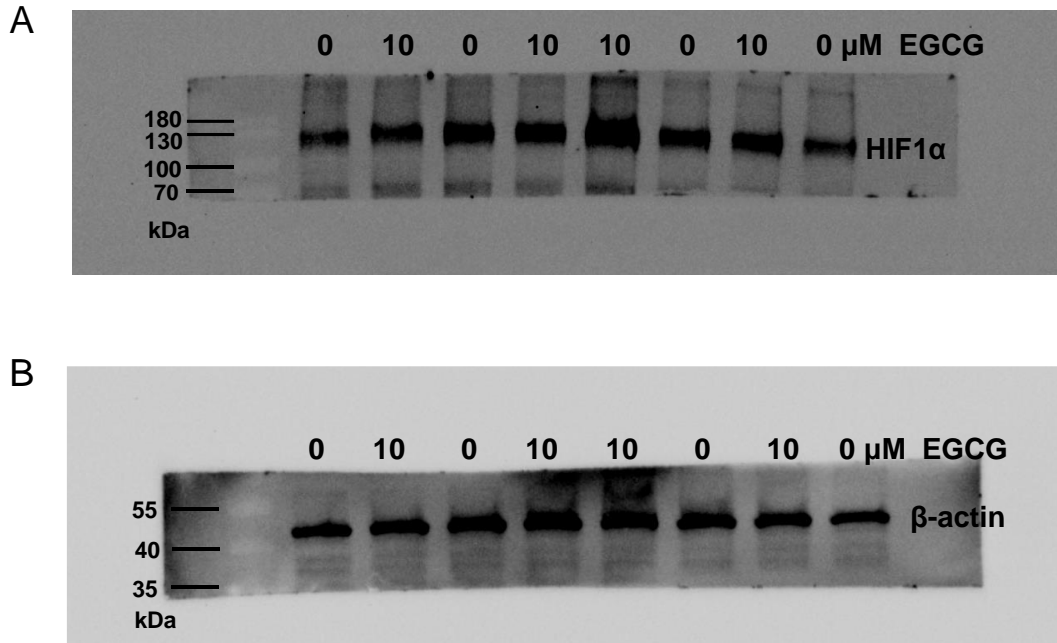

Fig. S1 Immunoblot analysis of HIF1α protein expression in cell monolayers. The Western blot was loaded with samples incubated with 0 or 10 μM EGCG (four replicates each) in the following order: 0, 10, 0, 10, 10, 0, 10, 0.

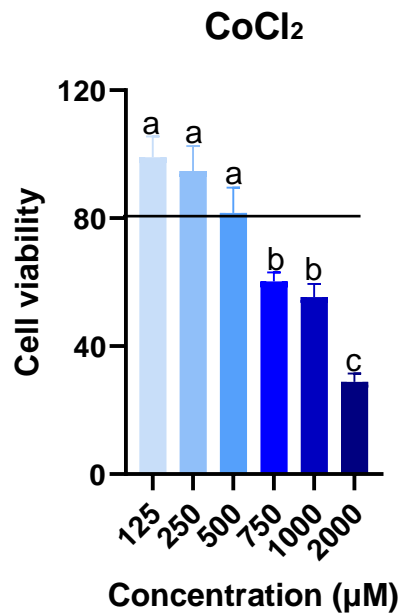

Fig. S2 Assessment of the different concentrations of CoCl<sub>2</sub> on Caco-2 cell viability by the CCK-8 assay

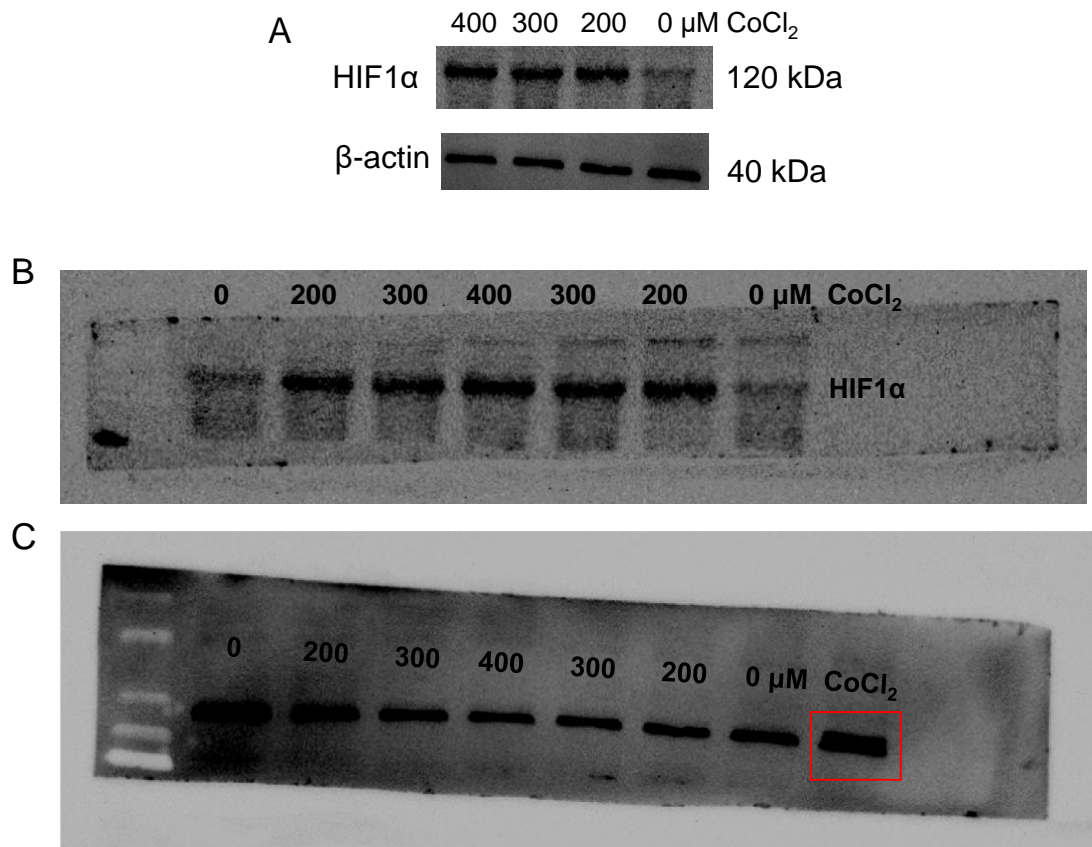

Fig. S3 Stabilizing effect of different concentrations of  $\text{CoCl}_2$  treatment on HIF-1 $\alpha$  protein expression. The Western blot was loaded with samples incubated with 0, 200, 300 and 400  $\mu\text{M}$  EGCG (two replicates for 0, 200 and 300  $\mu\text{M}$ ) in the following order: 0, 200, 300, 400, 300, 200, 0  $\mu\text{M}$ . The band in the red box is not relevant to this experiment.
